# Supplementary material
Source: Oxford University Press journal article supplement (doi:10.1093/g3journal_jkac148)
Supplement: jkac148_supplementary_figure_1.pdf [file jkac148_supplementary_figure_1.pdf]

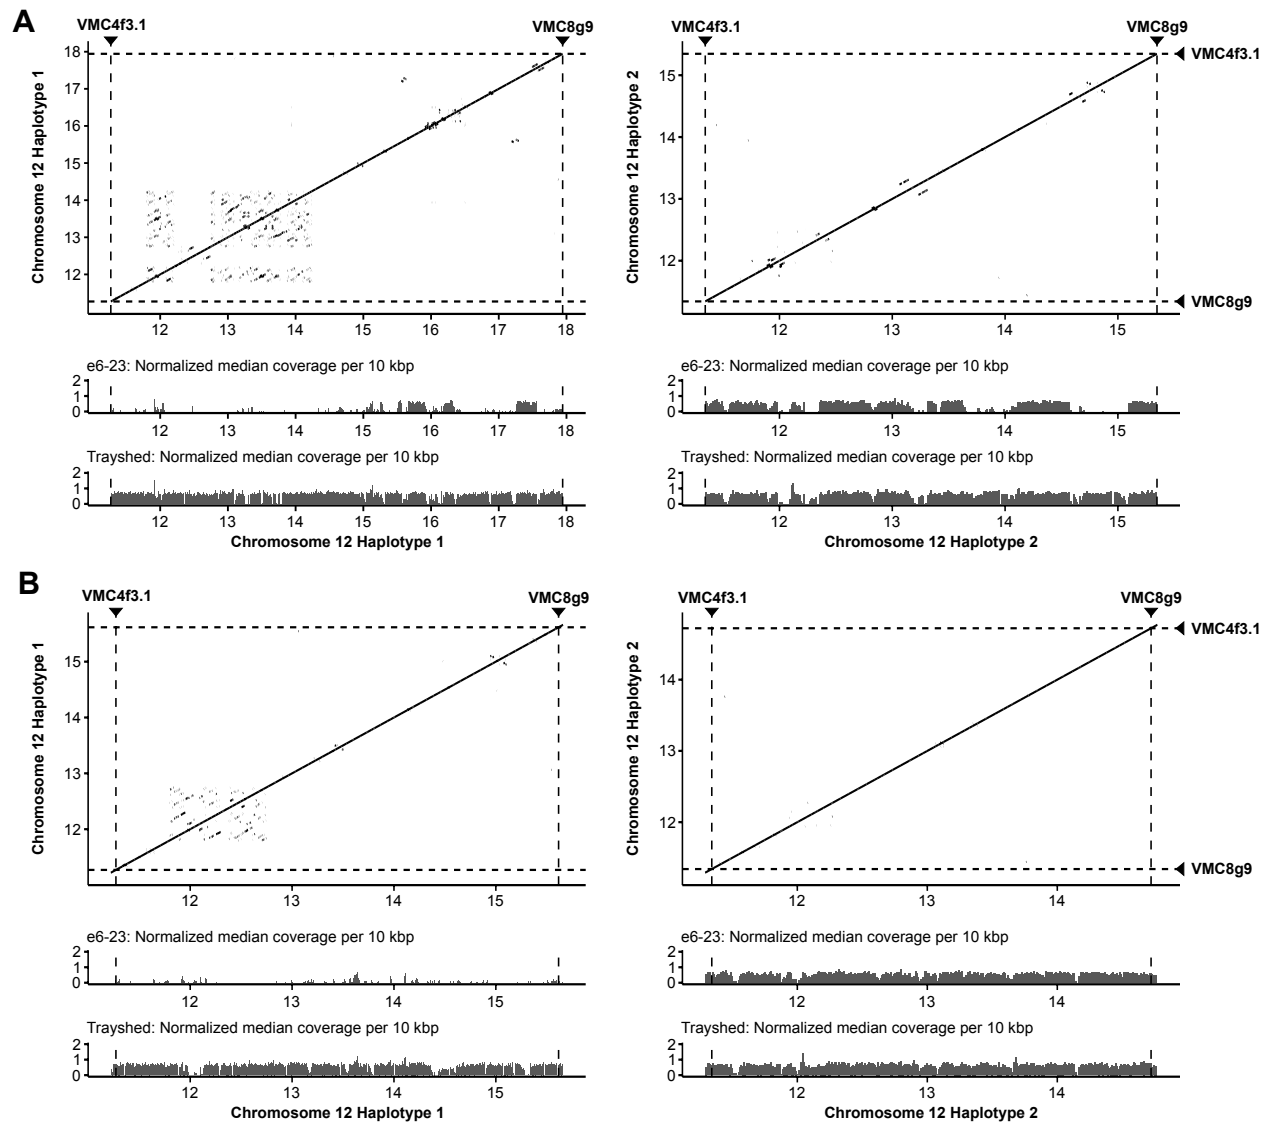

**Supplementary Fig. 1:** Reconstruction of *Run1.2a* and *Run1.2b* loci in *M. rotundifolia* Trayshed. Self-comparison of *Run1.2a* (chromosome 12 Haplotype 1) and *Run1.2b* (chromosome 12 Haplotype 2) loci, normalized median coverage of DNA-seq reads from e6-23 (*Run1.2b*<sup>+</sup>) and Trayshed (*Run1.2a/b*<sup>+</sup>) before (A) and after (B) reconstruction. Only DNA-seq reads aligning perfectly on the diploid genome of *M. rotundifolia* Trayshed were used for the base coverage analysis. Chromosomal position of the genetic markers VMC4f3.1 and WMC8g9 is indicated by black triangles and dashed lines.
